# Supplementary material
Source: publisher figshare collection journal article supplement (https://gsajournals.figshare.com/articles/dataset/_/6860723)

**GSP#1** *attR-CC.R* *attP.R*

*attR<sup>CC</sup>* *Modified CG1556* *FRT* *mW+ cassette* *attL<sup>CC</sup>* *FRT*

**GSP#2** *attR-TT.R* *attP.R*

*attR<sup>TT</sup>* *Modified CG11318* *loxP* *DsRed+ cassette* *attL<sup>TT</sup>* *loxP*

Genotype

- 1: WT  
 2: CG15556<sup>KO</sup> w FRT<sup>+</sup> attP<sup>CC+</sup>, CG11318<sup>KO</sup> mW loxP<sup>+</sup> attP<sup>TT+</sup>  
 3: CG15556<sup>KO</sup> w FRT<sup>+</sup> attP<sup>CC</sup>{CG15556<sup>Rescue</sup>, mW<sup>+</sup>, FRT}, CG11318<sup>KO</sup> DsRed<sup>+</sup> loxP<sup>+</sup> attP<sup>TT</sup>{CG11318<sup>Rescue</sup>, DsRed<sup>+</sup>, loxP}  
 4: CG15556<sup>KO</sup> w FRT<sup>+</sup> attP<sup>CC</sup>{CG15556<sup>Rescue</sup>}, CG11318<sup>KO</sup> DsRed<sup>+</sup> loxP<sup>+</sup> attP<sup>TT</sup>{CG11318<sup>Rescue</sup>}

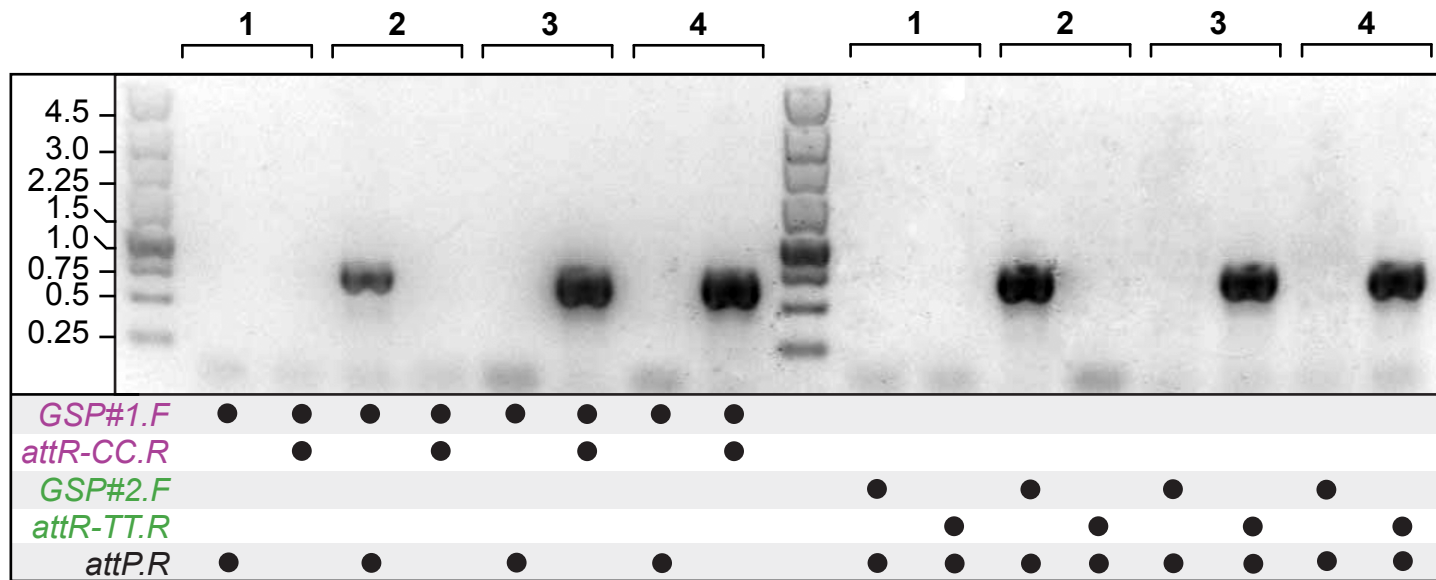

Supplement: Supplementary file 1 [file 1]
