# Supplementary material
Source: publisher figshare collection journal article supplement (https://gsajournals.figshare.com/articles/dataset/_/6860723)

A

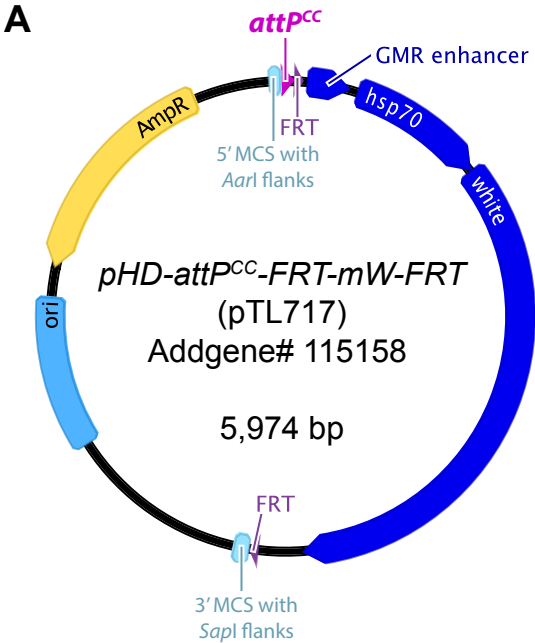

B

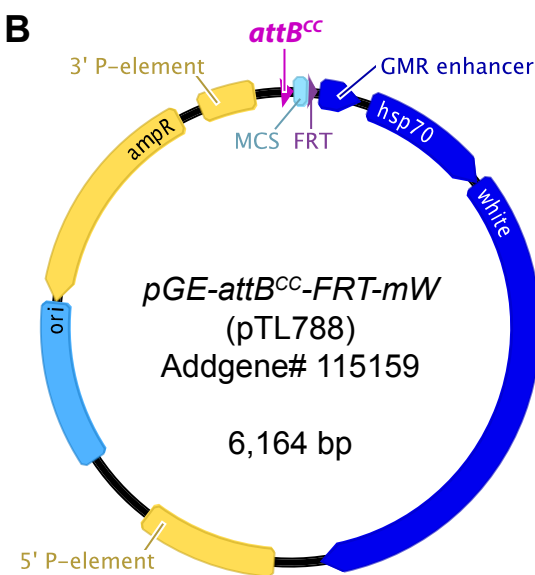

C

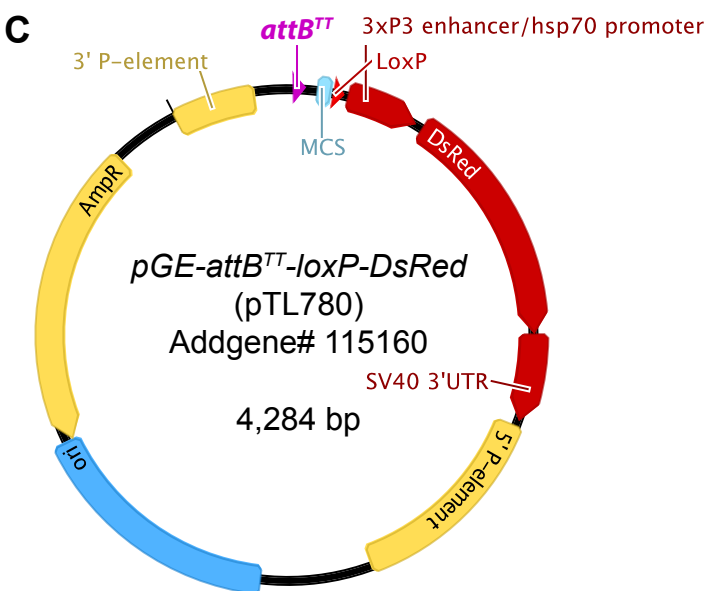

D

## Primer design for homology arm 1 (AarI)

Plasmid sequence *pHD-attP<sup>CC</sup>-FRT-mW-FRT* (pTL717)

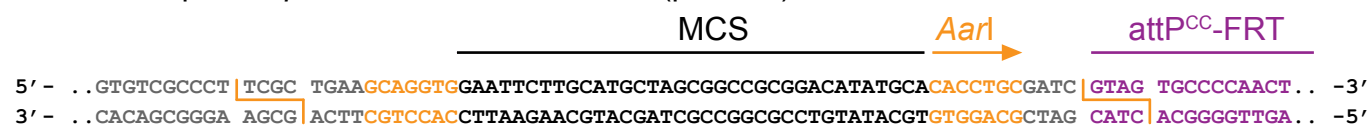

Primer

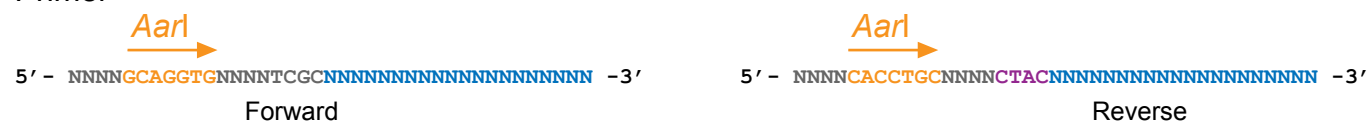

PCR product

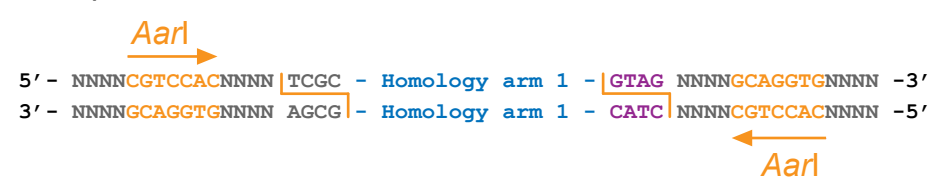

## Primer design for homology arm 2 (SapI)

Plasmid sequence *pHD-attP<sup>CC</sup>-FRT-mW-FRT* (pTL717)

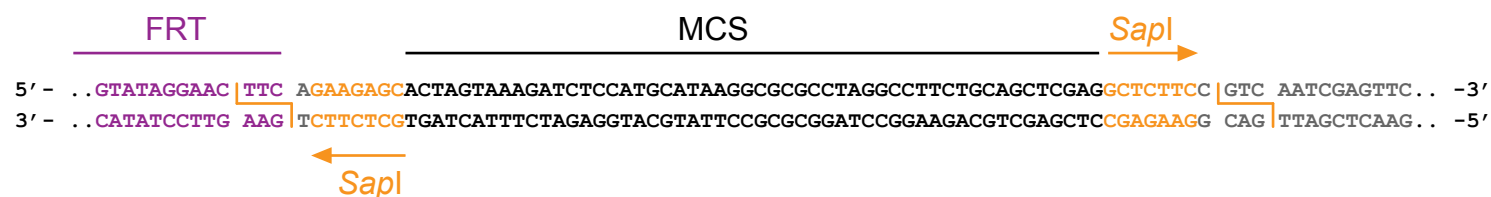

Primer

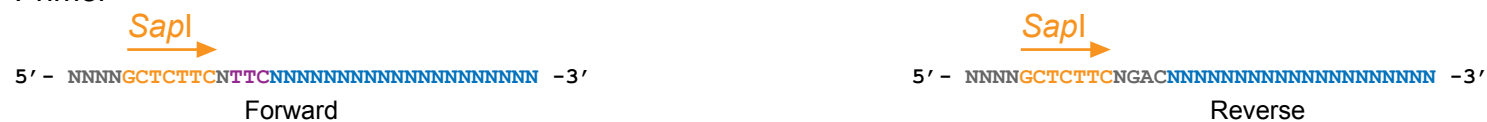

PCR product

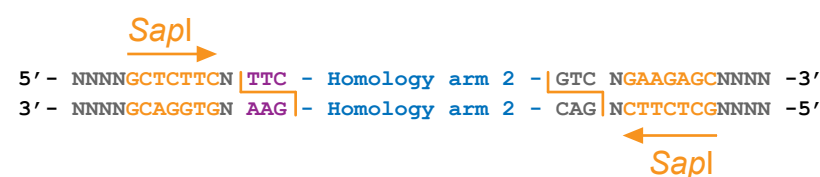

Supplement: Supplementary file 2 [file 1]
